# Supplementary material for: Hepatocyte HSPA12A inhibits macrophage chemotaxis and activation to attenuate liver ischemia/reperfusion injury via suppressing glycolysis-mediated HMGB1 lactylation and secretion of hepatocytes
Source: PubMed Central journal article supplement (PMC10334822; doi:10.7150/thno.82607), 2023-07-03
Supplement: thnov13p3856s1.pdf [file thnov13p3856s1.pdf]

## Supplemental Materials

### Figure legends

#### **Figure S1. Optimizing experimental conditions for liver ischemia/reperfusion (LI/R) in mouse and hypoxia/reoxygenation (H/R) in hepatocytes.**

- A. Mice experiments.** After ischemia for 1 h followed by reperfusion for the indicated durations, ALT and AST activities in serum of mice were examined. Data are mean  $\pm$  SD, \*\*  $P < 0.01$  vs. sham mice by one-way ANOVA followed by Tukey's test.  $n = 6$ /group for sham,  $n = 3$ /group for 3 h reperfusion, and  $n = 7$ /group for 6 h reperfusion.
- B. Hepatocyte experiments.** After hypoxia for 3 h followed by reoxygenation for the indicated durations, ALT and AST activities in culture medium of hepatocytes were examined. Data are mean  $\pm$  SD, \*\*  $P < 0.01$  vs. normoxia controls by one-way ANOVA followed by Tukey's test.  $n = 6$ /group.

#### **Figure S2. Creation of knockin mice with hepatocyte-specific overexpression of HSPA12A (h-Ki).**

- A.** Scheme for constructing conditional *Hspa12a* knockin mice.
- B.** Cross breeding strategy for generation hepatocyte-specific *Hspa12a* knockin mice using Alb-Cre transgenic mice.
- C.** Genotyping of offsprings from cross breeding using PCR.

#### **Figure S3. HSPA12A was specifically overexpressed in hepatocytes of h-Ki mice.**

- A.** HSPA12A expression was examined in different organs using immunoblotting. Note that

HSPA12A was only overexpressed in h-Ki livers. \* Highlighted the high expression of HSPA12A in liver. n = 5/group.

- B.** HSPA12A expression was examined in primary hepatocytes and macrophages that isolated from mice. Note that HSPA12A was overexpressed in hepatocytes but not in hepatic macrophages of h-Ki mice. n = 5/group.

**Figure S4. HSPA12A knock-in itself did not cause liver injury in mice**

- A. Serum ALT and AST activities.** Serum was collected from WT and h-Ki mice in sham groups for measuring ALT and AST activities. n = 6/group.
- B. Oil Red O staining.** WT and h-Ki mice frozen liver sections were stained using **Oil Red O** to indicate lipid deposition. Scale bar = 100  $\mu$ m. n = 4/group.

**Figure S5. KO mice aggravate LI/R injury.**

- A. Serum ALT and AST activities.** Serum was collected from mice after sham or LI/R for measuring ALT and AST activities. Data are mean  $\pm$  SD, \*\*  $P < 0.01$  by two-way ANOVA followed by Tukey's test. n = 6/groups.
- B. Histological examination.** After sham or LI/R, liver tissues were collected, paraffin-embedded sectioned, and HE stained. Suzuki's scoring was performed and hepatic necrosis areas were measured to indicate histological injury to indicate histological injury. Scale bar = 200  $\mu$ m. Data are mean  $\pm$  SD, \*  $P < 0.05$ , \*\*  $P < 0.01$  by two-way ANOVA followed by Tukey's test. n = 6/group.
- C. Mouse survival.** Mice mortality was recorded after LI/R. \* $P < 0.05$  by log-rank test, n = 24/group.

**Figure S6. Hepatocyte HSPA12A paracrinally inhibited macrophage activation.**

- A. Experimental protocol.** Primary hepatocytes were exposed to H/R for 6 h/3 h, and the culture medium was collected as conditioned medium (CM). The hepatocyte CM was then added to Raw264.7 macrophages.
- B. Macrophage morphology.** After incubation with hepatocyte CM for 24 h, morphology of Raw264.7 macrophages were examined using phase-contrast microscope. n = 5/group.
- C. Gene expression in macrophages.** After incubation with hepatocyte CM for 24 h, Raw264.7 macrophages were collected for measuring expression of the indicated genes using PCR. Data are mean  $\pm$  SD, \*\*  $P < 0.01$  by Student's two-tailed unpaired  $t$  test. n = 6/group.

**Figure S7. HSPA12A protected hepatocytes against H/R challenge with or without macrophage coculture.**

- A. H/R-induced hepatocyte injury.** Primary hepatocytes were exposed to H/R for 6 h/3 h. Culture medium was collected for measuring ALT and AST activities. n = 6/group.
- B. Effects of macrophage coculture on the injury of H/R-exposed hepatocytes.** Primary hepatocytes that growing on lower layer of Transwell plate were exposed to H/R for 6 h/3 h and followed by coculture with macrophages that growing on insert membrane. After coculturing for 24 h, medium ALT and AST activities were measured. n = 6/group.

Data are mean  $\pm$  SD, \*\*  $P < 0.01$  by two-way ANOVA followed by Tukey's test.

**Figure S8. Serum HMGB1 level.** Serum was collected from mice after sham or LI/R for measuring HMGB1 by ELISA. Data are mean  $\pm$  SD. \*\*  $P < 0.01$  by two-way ANOVA followed by Tukey's test.  $n = 8$  for sham groups and  $n = 12$  for LI/R groups.

**Figure S9. Medium HMGB1 examination.**

- A. Experimental protocol.** Primary hepatocytes were exposed to H/R for 6 h/3 h.
- B.** Medium of hepatocyte culture were collected for HMGB1 examination by immunoblotting.

**Figure S10. HMGB1 was knockdown in primary hepatocytes.**

- A.** Primary hepatocytes were transfected with *Hmgb1*-siRNA to knockdown HMGB1 expression. The hepatocytes transfected with scrambled RNA served as controls. The efficiency of HMGB1 knockdown was evaluated by immunoblotting. Data are mean  $\pm$  SD, \*\*  $P < 0.01$  by Student's two-tailed unpaired t test,  $n = 6$ /group.
- B. ALT and AST measurement.** After primary hepatocytes were transfected with *Hmgb1*-siRNA (*Si-Hmgb1*) and scramble RNA treatment served control, culture medium was collected after 24 hours for measuring ALT and AST activities.  $n = 6$ /group.

**Figure S11. HMGB1 knockdown reversed the enhancement of H/R injury in HSPA12A knockout hepatocytes.**

- A. Experimental protocol.** Primary hepatocytes were transfected with *Hmgb1*-siRNA to knockdown HMGB1 expression, and hepatocytes transfected with scrambled RNA served as controls. Twenty-four hours later, hepatocytes were exposed to H/R for 6 h/3 h.

**B. ALT and AST measurement.** After H/R experiments, culture medium was collected for measuring ALT and AST activities. Data are mean  $\pm$  SD, \*\*  $P < 0.01$  by two-way ANOVA followed by Tukey's test. ns, no significance. n = 5/group.

**Figure S12. HSPA12A overexpression inhibited the H/R-induced increase of HMGB1 lactylation in hepatocytes.**

**A. Klac levels in HMGB1 immunoprecipitates.** After exposed to H/R or normoxia, primary hepatocytes were prepared for anti-HMGB1 immunoprecipitation, and the immunoprecipitates were immunoblotted for lysine lactylation (Klac) and HMGB1. Data are mean  $\pm$  SD, \*\*  $P < 0.01$  by two-way ANOVA followed by Tukey's test, n = 3/group.

**B. Colocalization of Klac and HMGB1.** After H/R experiments, primary hepatocytes were immunostained with Klac and HMGB1. DAPI was used to counter stain nuclei. Note that the H/R-increased Klac-HMGB1 colocalization was attenuated in cytoplasm of HSPA12A Ki hepatocytes. n = 3/group.

**Figure S13. HSPA12A overexpression prevented the H/R-induced increase of glycolysis-derived lactate levels of hepatocytes.**

**A. Experimental protocol.** Primary hepatocytes were exposed to H/R for 6 h/3 h.

**B. Extracellular lactate levels.** Lactate levels were examined in culture medium. n = 6/group.

**C. Expression of glycolysis-related genes.** After H/R, primary hepatocytes were collected for examining the indicated gene expression using immunoblotting analysis. n = 4/group.

Data are mean  $\pm$  SD, \*\*  $P < 0.01$  by two-way ANOVA followed by Tukey's test.

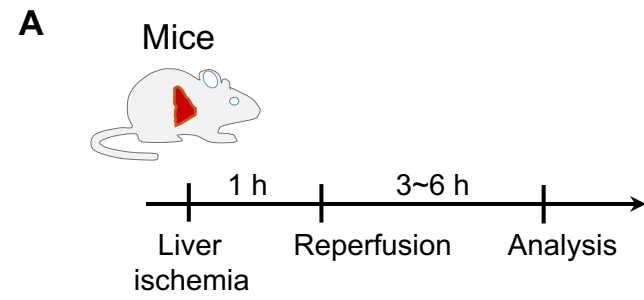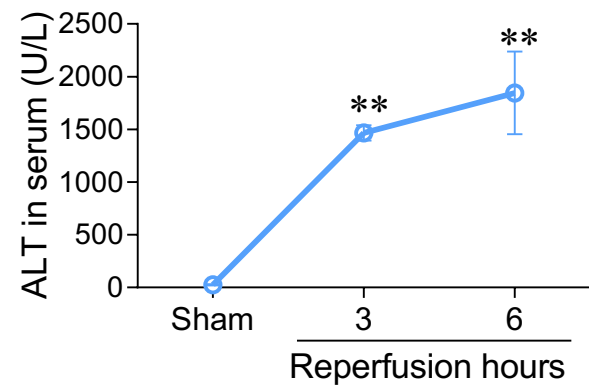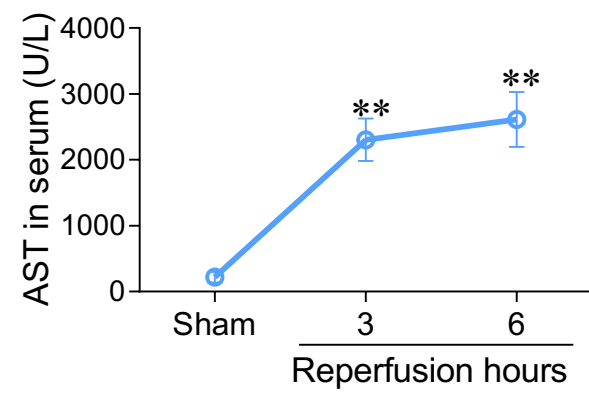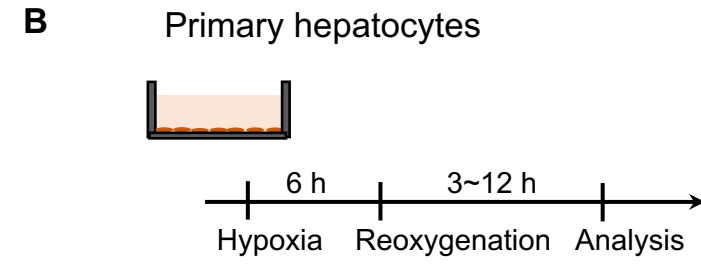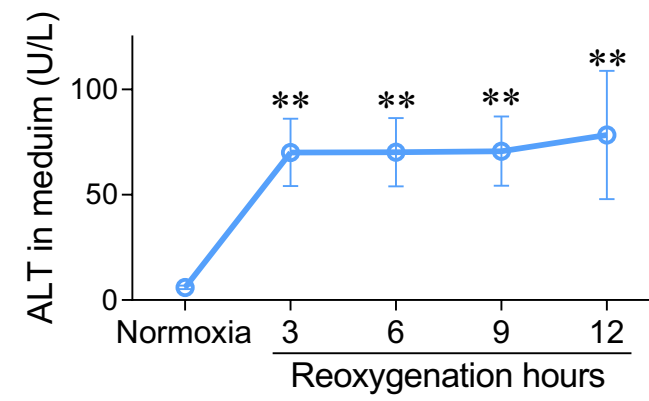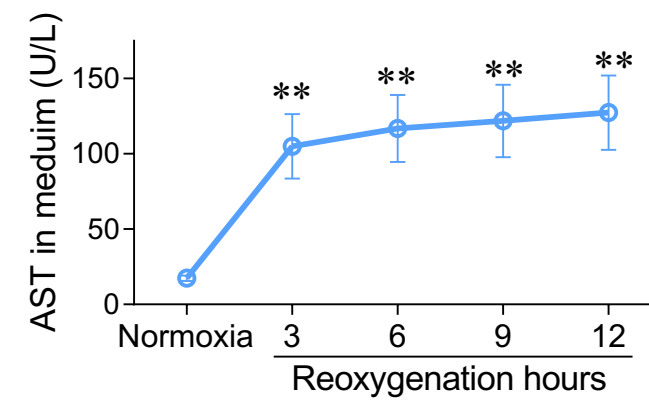

**Figure S1**

**A**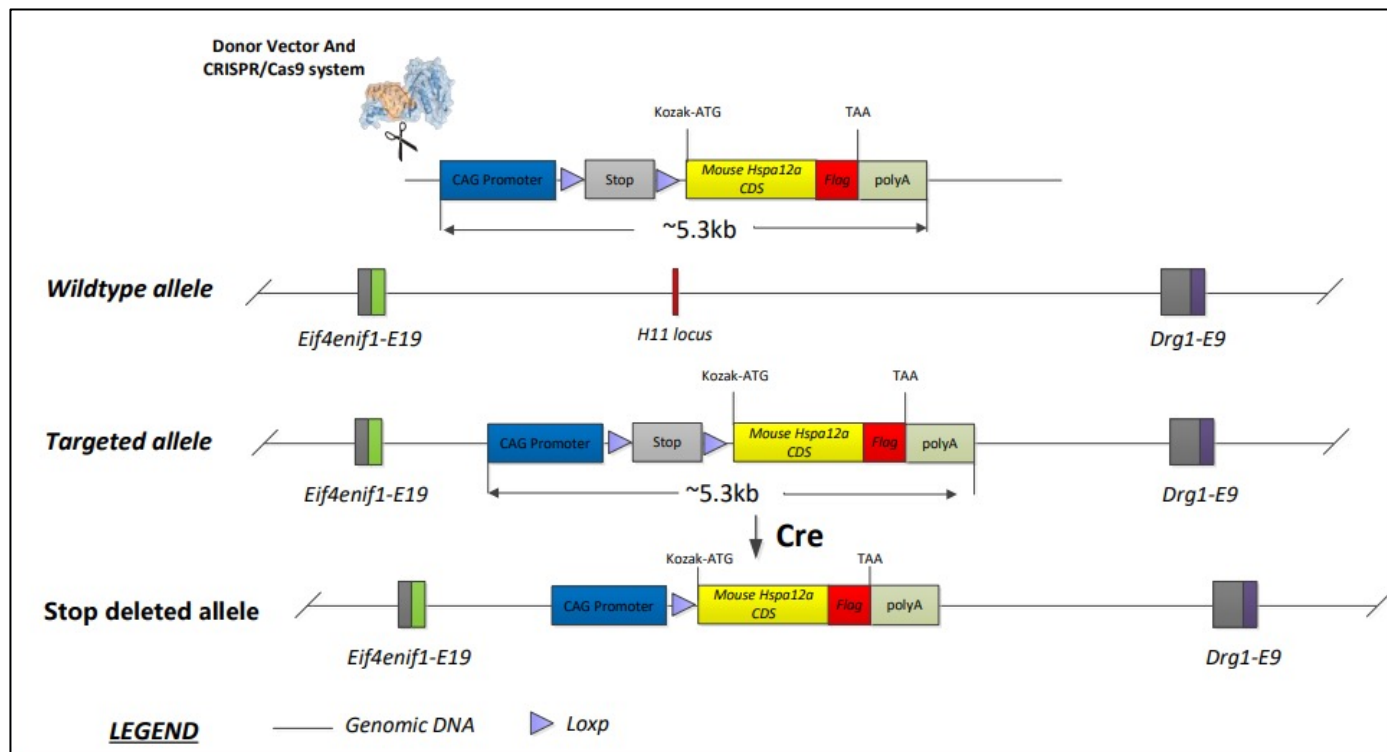**B**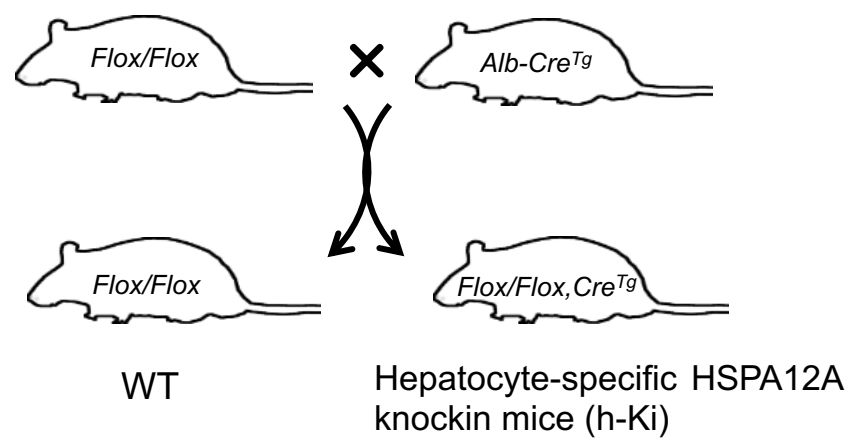**C**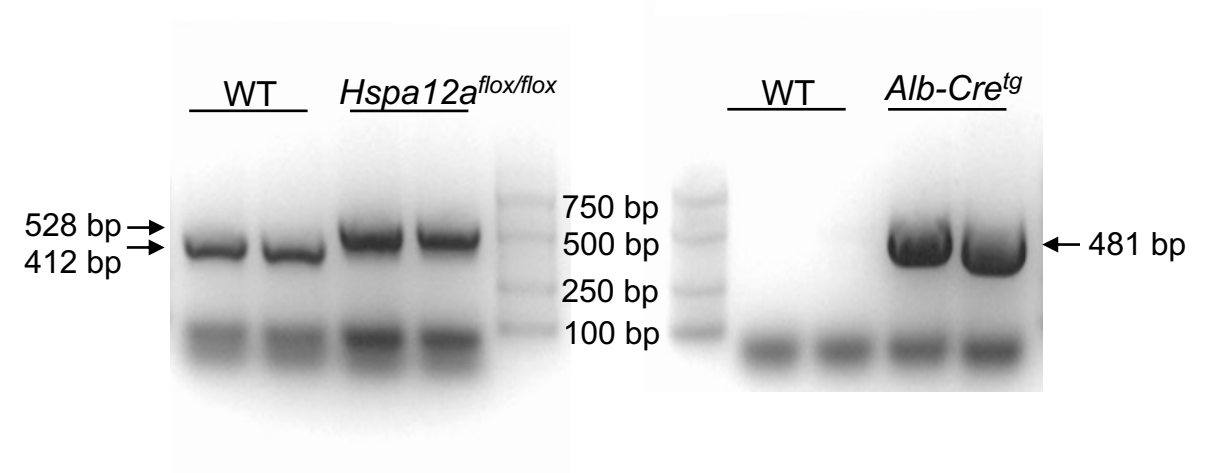**Figure S2**

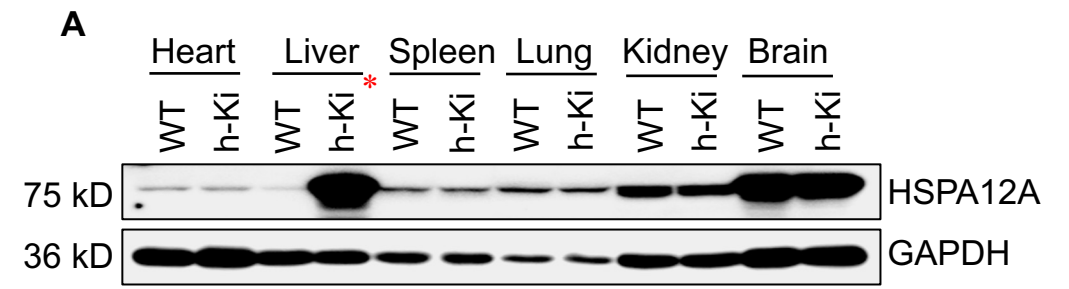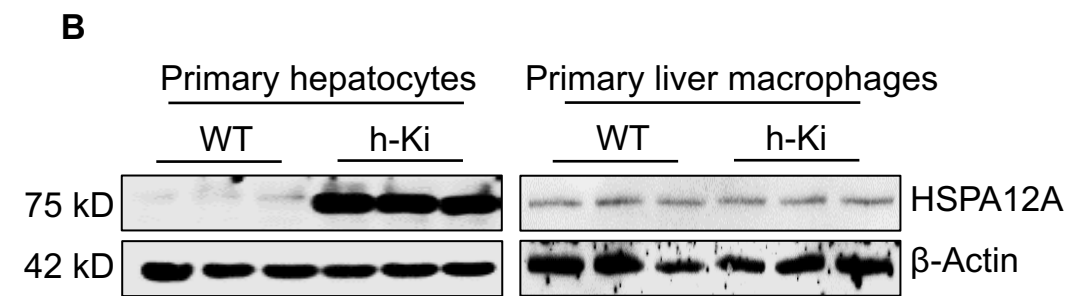

**Figure S3**



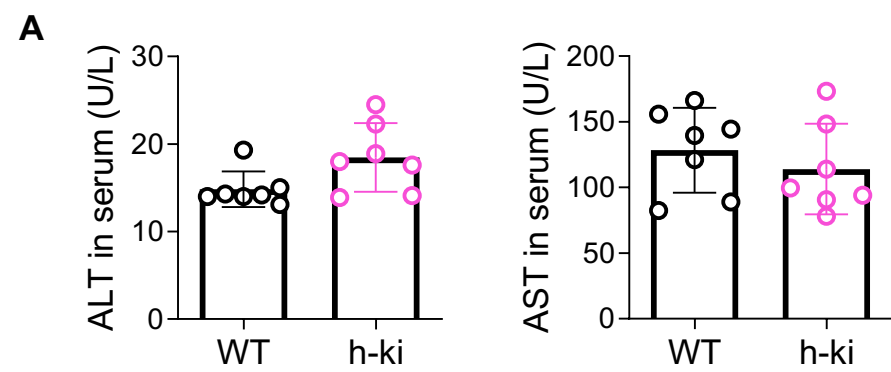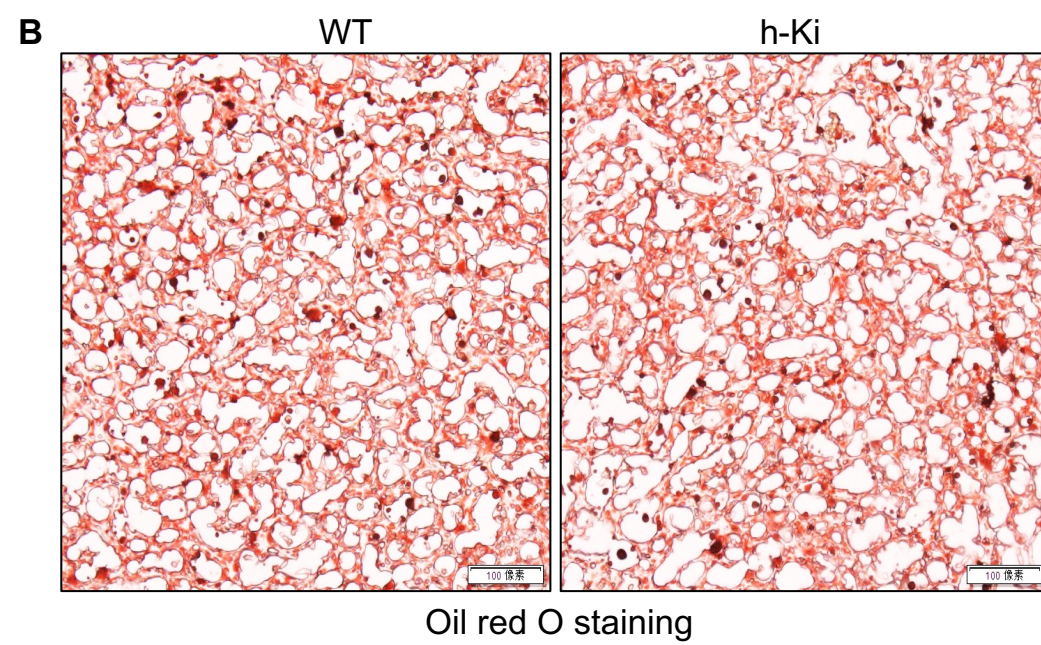

**Figure S4**

**A**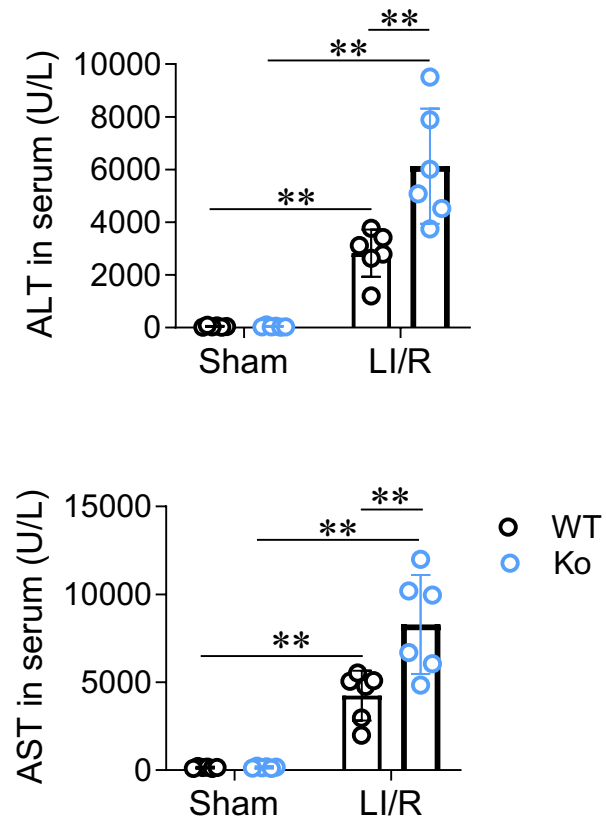**B**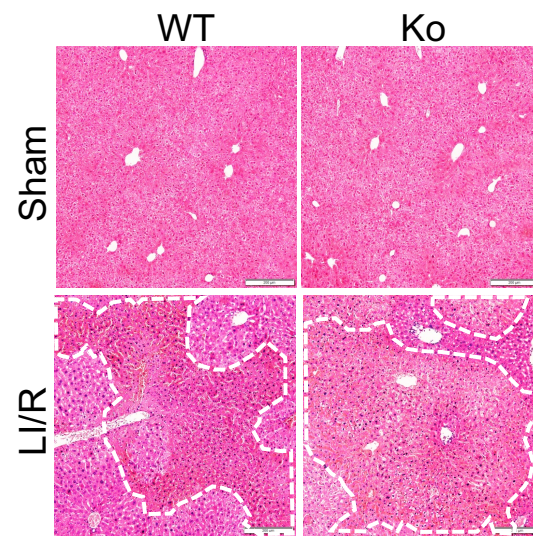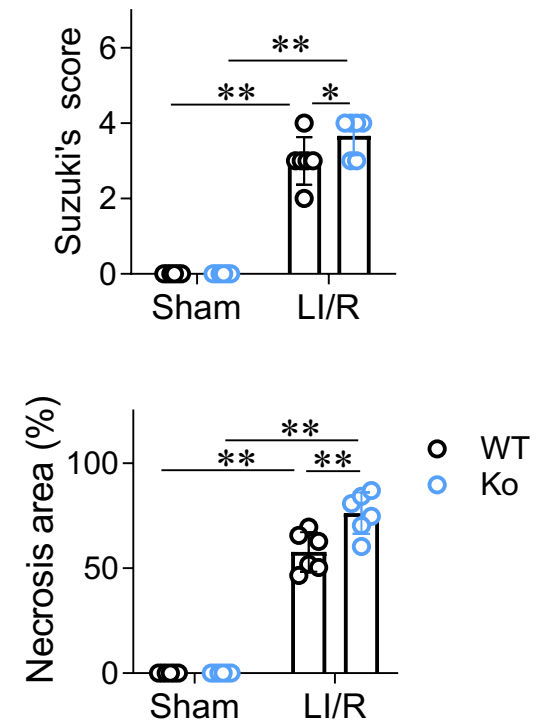**C**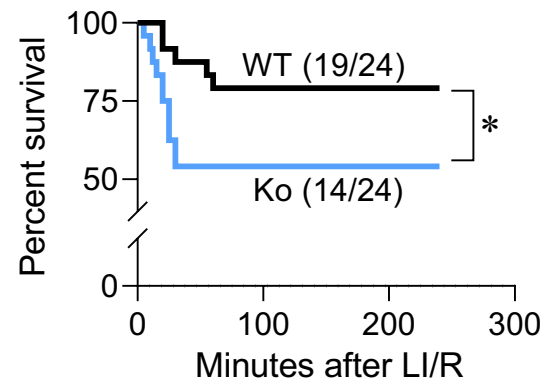**Figure S5**

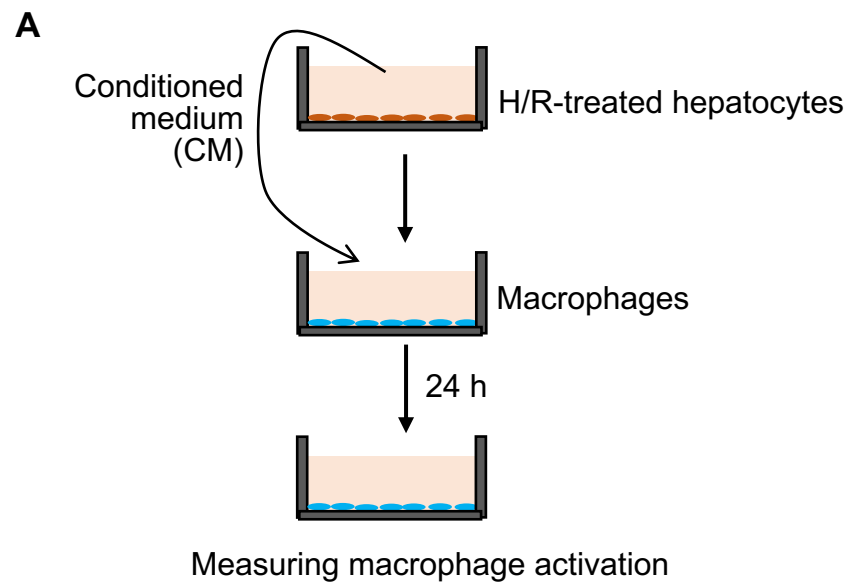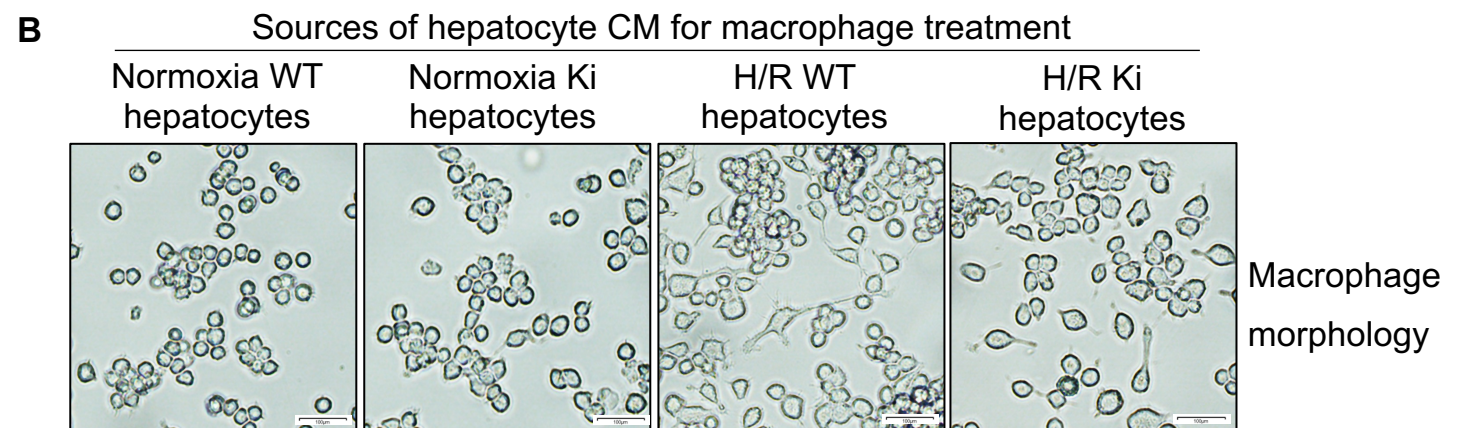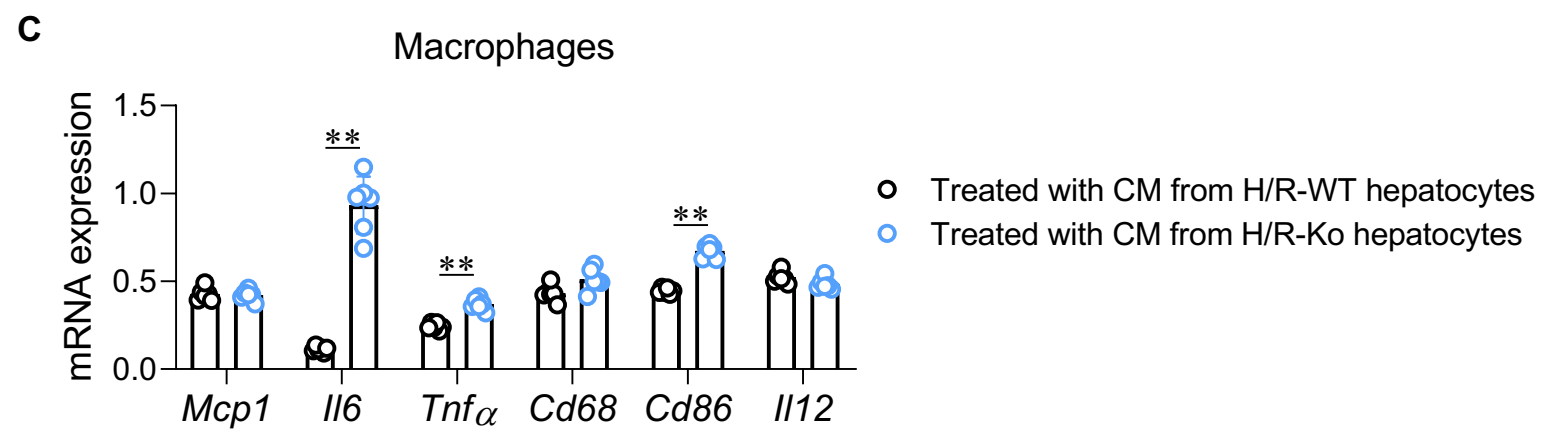

**Figure S6**

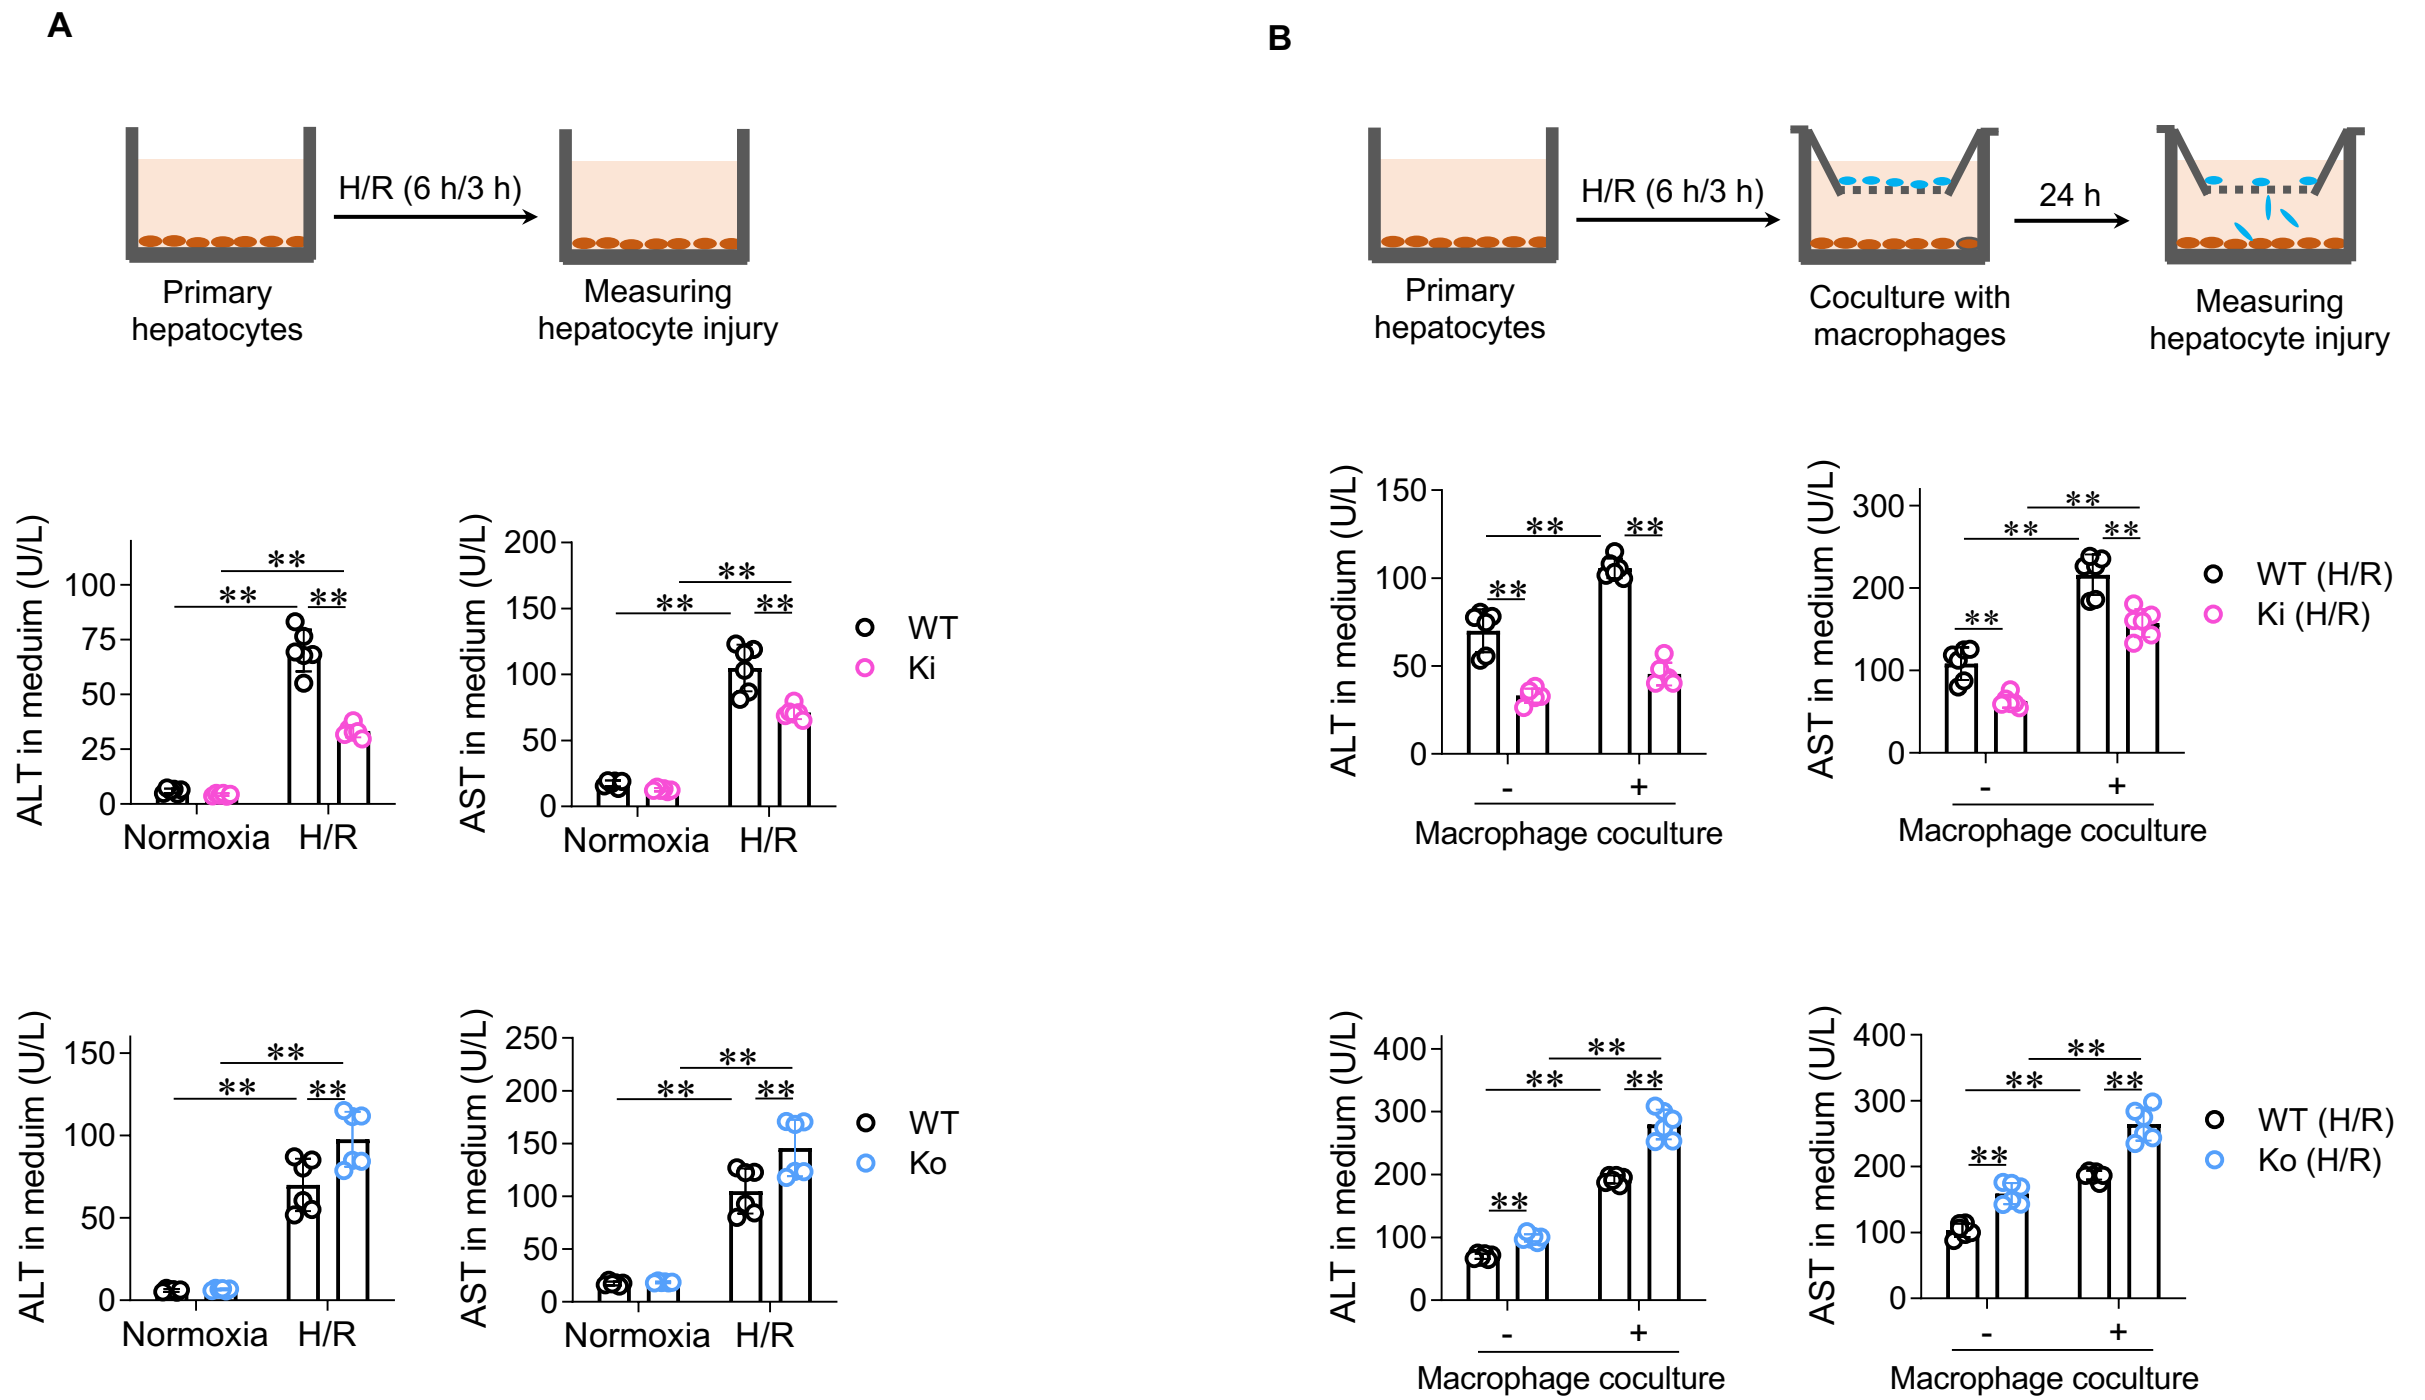

**Figure S7**

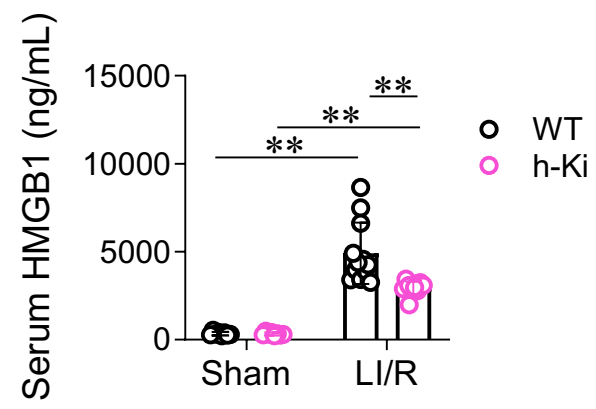

**Figure S8**

**A**

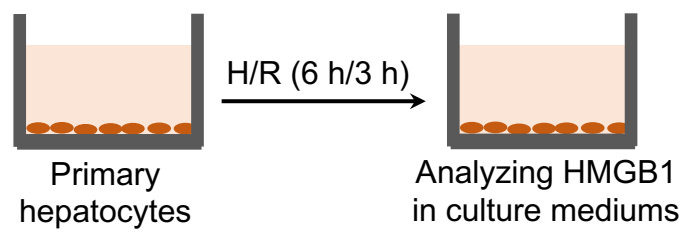

**B**

|       |   |   |   |   |                |
|-------|---|---|---|---|----------------|
|       | + | + | - | - | Normoxia       |
|       | - | - | + | + | H/R            |
|       | + | - | + | - | WT             |
|       | - | + | - | + | <i>Ki</i>      |
| 26 kD |   |   |   |   | HMGB1 (medium) |

**Figure S9**

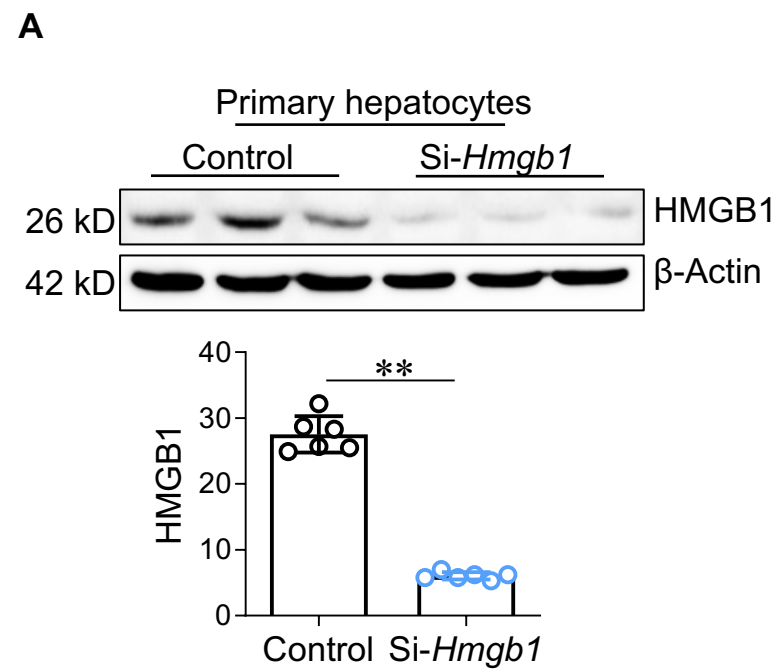

**B**

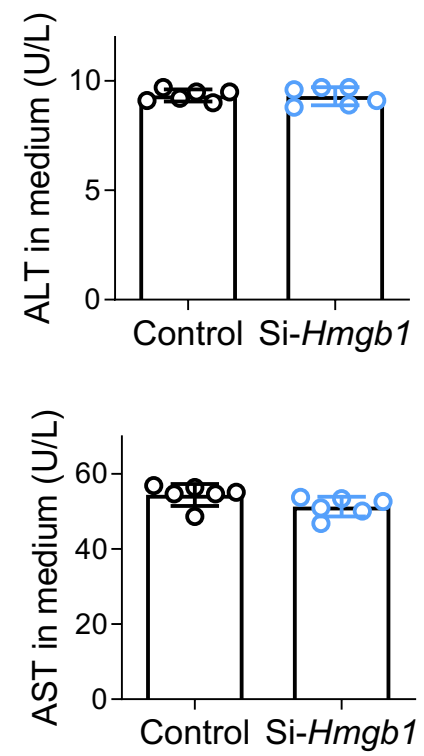

Figure S10

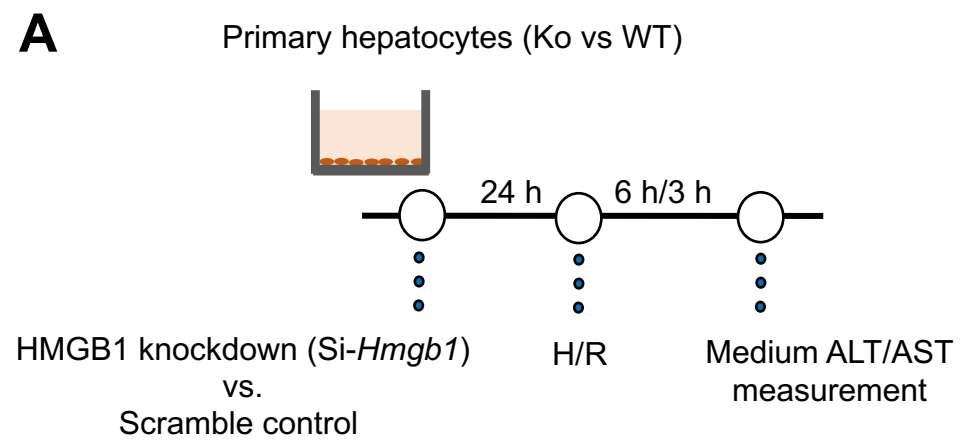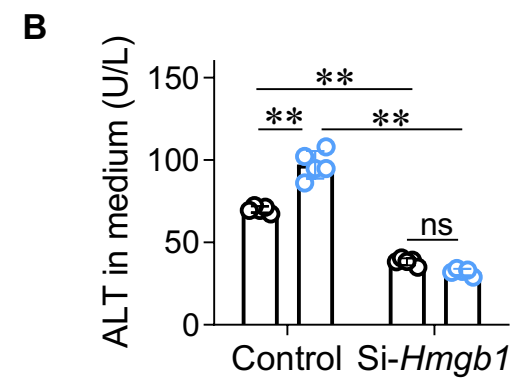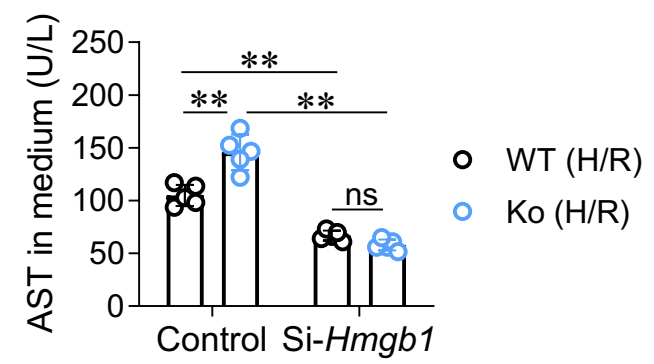

**Figure S11**



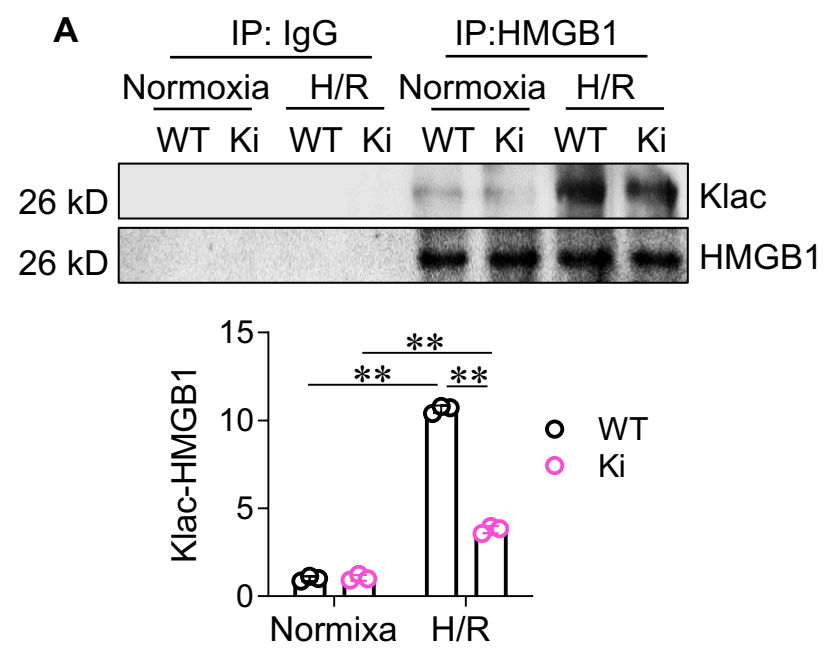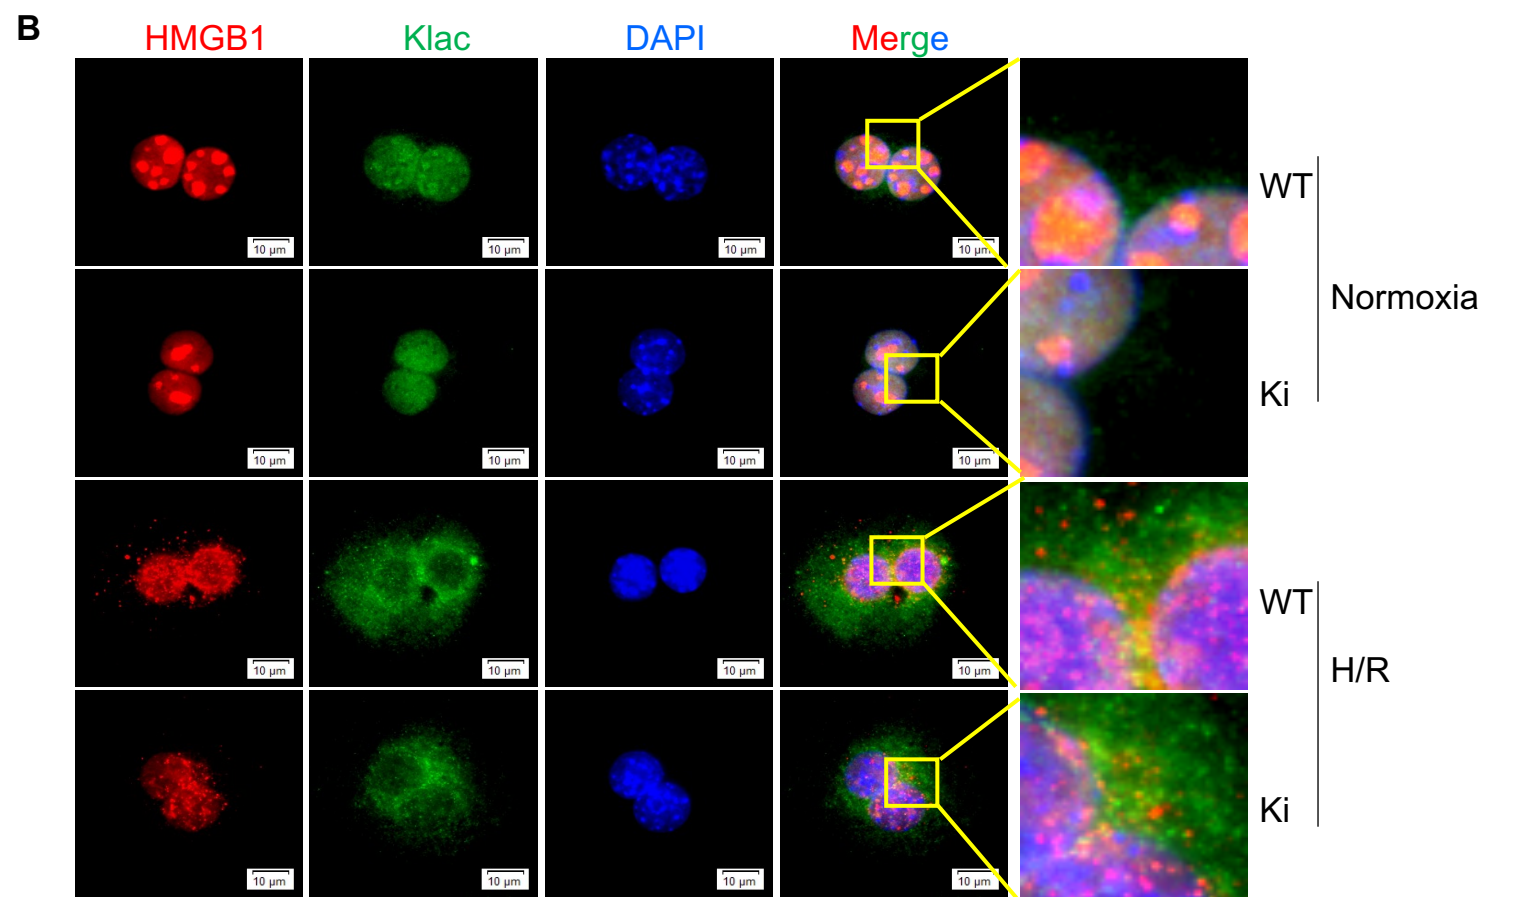

**Figure S12**

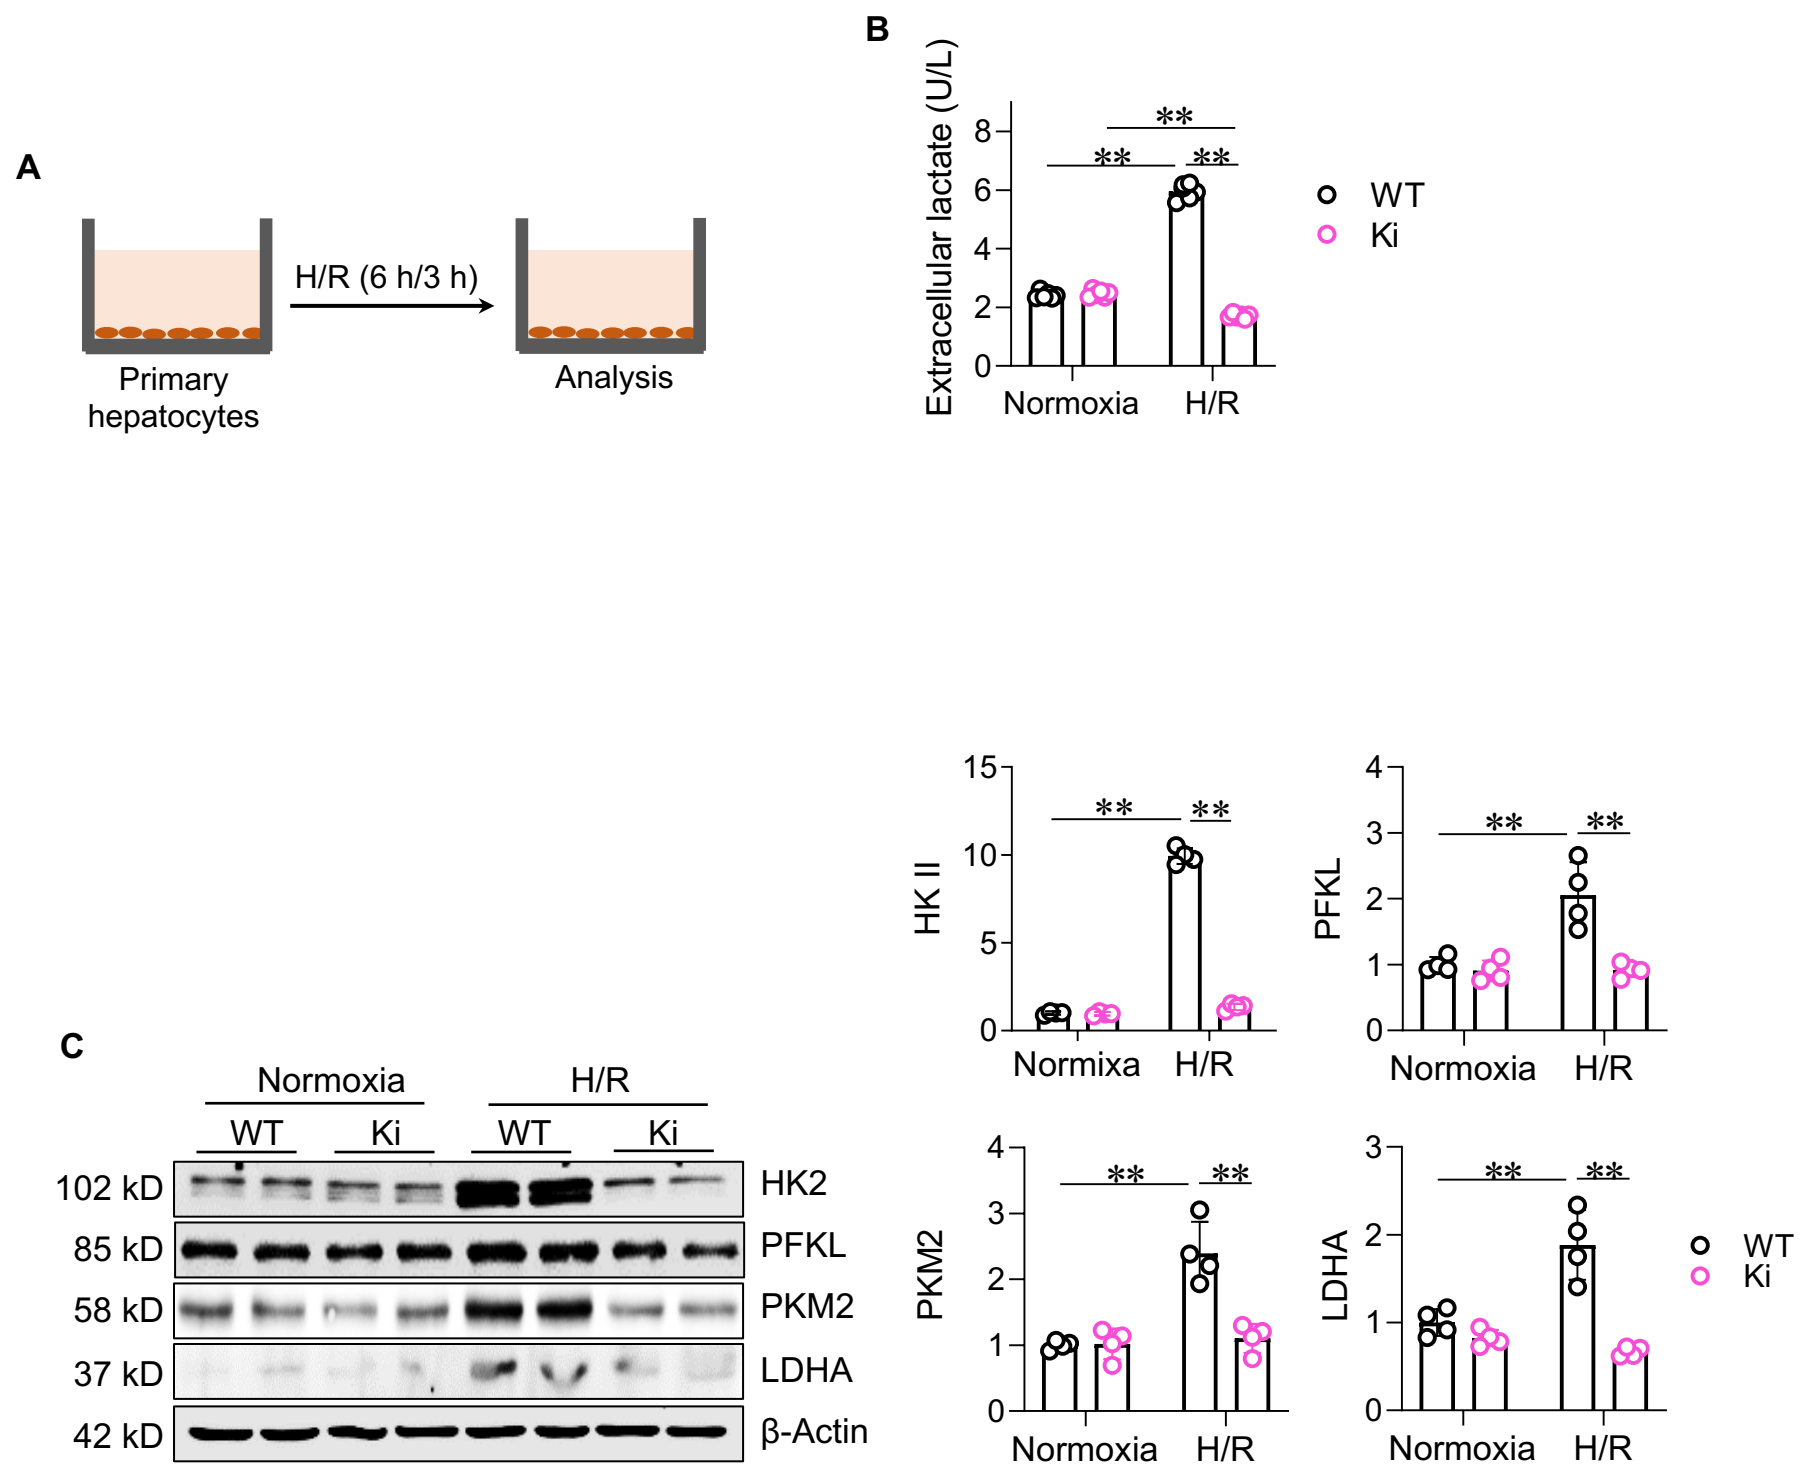

**Figure S13**
